# Supplementary material
Source: PubMed Central journal article supplement (PMC9990999)
Supplement: 2022-09-29_als-mirna_2ndrev_si_ddac250.pdf [file 2022-09-29_als-mirna_2ndrev_si_ddac250.pdf]

## SUPPLEMENTARY FOR

### miRNA analysis reveals novel dysregulated pathways in amyotrophic lateral sclerosis

Junguk Hur<sup>a,§</sup>, Ximena Paez-Colasante<sup>b,§,#</sup>, Claudia Figueroa-Romero<sup>b,c,§</sup>, Ting-wen Lo<sup>d</sup>, Sami J. Barmada<sup>b</sup>, Michelle Paulsen<sup>e</sup>, Mats Ljungman<sup>e,f</sup>, Fadhl M. Alakwaa<sup>b</sup>, Masha G. Savelieff<sup>c</sup>, Stephen A. Goutman<sup>b,c,\*</sup>, and Eva L. Feldman<sup>b,c,\*</sup>

<sup>a</sup>Department of Biomedical Sciences, University of North Dakota, Grand Forks, ND 58202, USA

<sup>b</sup>Department of Neurology, University of Michigan, Ann Arbor, MI 48109, USA

<sup>c</sup>NeuroNetwork for Emerging Therapies, University of Michigan, Ann Arbor, MI 48109, USA

<sup>d</sup>Department of Chemical Engineering, University of Michigan, Ann Arbor, MI 48109, USA

<sup>e</sup>Department of Radiation Oncology, University of Michigan, Ann Arbor, MI 48109, USA

<sup>f</sup>Department Environmental Health Sciences, University of Michigan, Ann Arbor, MI 48109, USA

<sup>#</sup>Current address: Department of Biochemistry and Biophysics, Texas A&M University, College Station, TX 77845, USA

<sup>§</sup> These authors contributed equally.

\*Corresponding Authors:

Stephen A. Goutman, MD, MS

Department of Neurology

1500 E Medical Center Dr

Ann Arbor, MI 48109-5223, USA

Phone: 734-936-8586

Fax: 734-936-5185

e-mail: [sgoutman@med.umich.edu](mailto:sgoutman@med.umich.edu)

Eva L. Feldman, MD, PhD

Department of Neurology

109 Zina Pitcher Place

Ann Arbor, MI 48109-5223

Phone: 734-936-8586

Fax: 734-936-5185

e-mail: [efeldman@umich.edu](mailto:efeldman@umich.edu)

## Table of Contents

|                                                                                                                               |    |
|-------------------------------------------------------------------------------------------------------------------------------|----|
| Supplementary Figures.....                                                                                                    | 3  |
| Supplementary Figure S1. Trends of miRNA levels in fibroblasts and whole blood from C9-ALS and nonC9-ALS versus controls..... | 3  |
| Supplementary Figure S2. Trends of positive and negative control and reference (housekeeping gene) probes.....                | 4  |
| Supplementary Figure S3. qPCR validation of differential miRNAs in fibroblasts.....                                           | 5  |
| Supplementary Tables.....                                                                                                     | 6  |
| Supplementary Table S1. Differential miRNAs in fibroblasts.....                                                               | 6  |
| Supplementary Table S2. Differential miRNAs in whole blood.....                                                               | 9  |
| Supplementary Table S3. Significant KEGG pathways among the miRNA targets.....                                                | 12 |

## Supplementary Figures

### Supplementary Figure S1. Trends of miRNA levels in fibroblasts and whole blood from C9-ALS and nonC9-ALS versus controls

(A) Principal component analysis of overall miRNA distribution in fibroblasts (red) and whole blood (cyan). Groups are represented by node shape, C9-ALS (circles, nonC9-ALS (squares), and controls (triangles). (B) Principal component analysis of miRNA distribution by tissue (fibroblasts, left; whole blood, right) in C9-ALS (red), nonC9-ALS (blue), and control (black) samples.

**A**

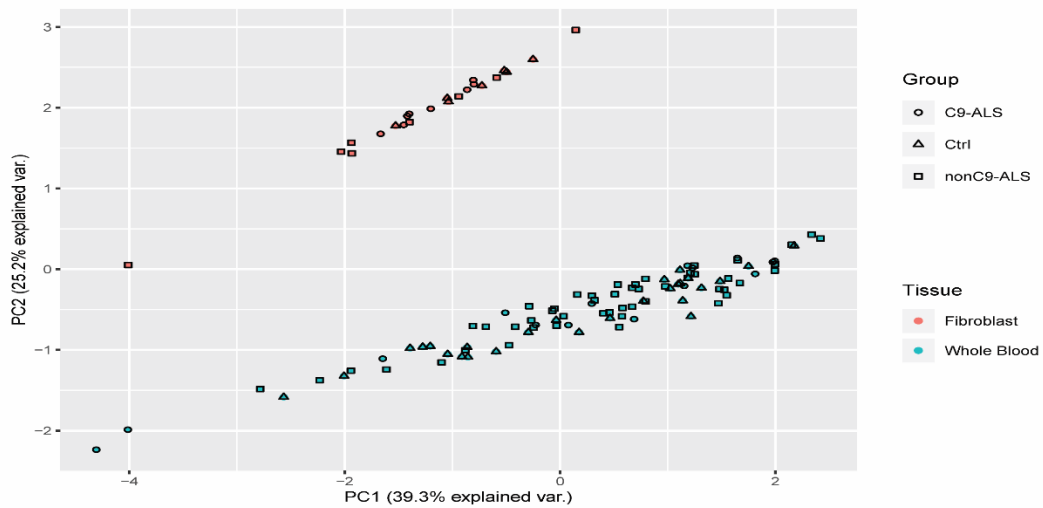

**B**

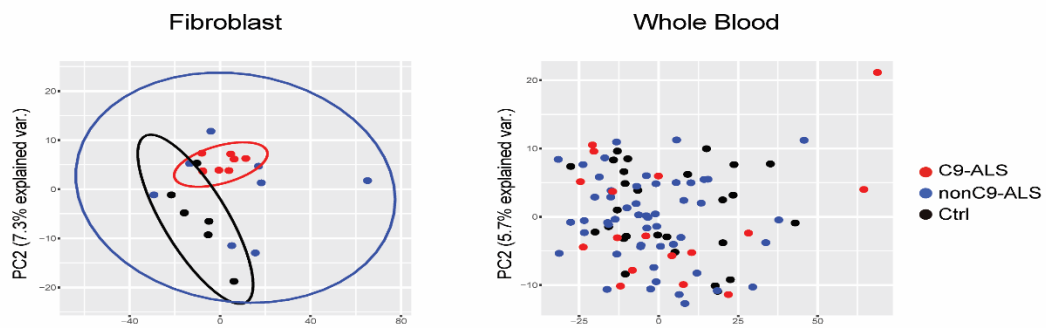

### Supplementary Figure S2. Trends of positive and negative control and reference (housekeeping gene) probes

The log<sub>2</sub>-transformed raw counts of the positive control, negative control, and reference gene probes, that are embedded in the NanoString nCount system, are depicted in line plots. The normalization of the raw count data was done by NanoStringDiff based on these quality control probes, which showed relatively consistent patterns across samples.

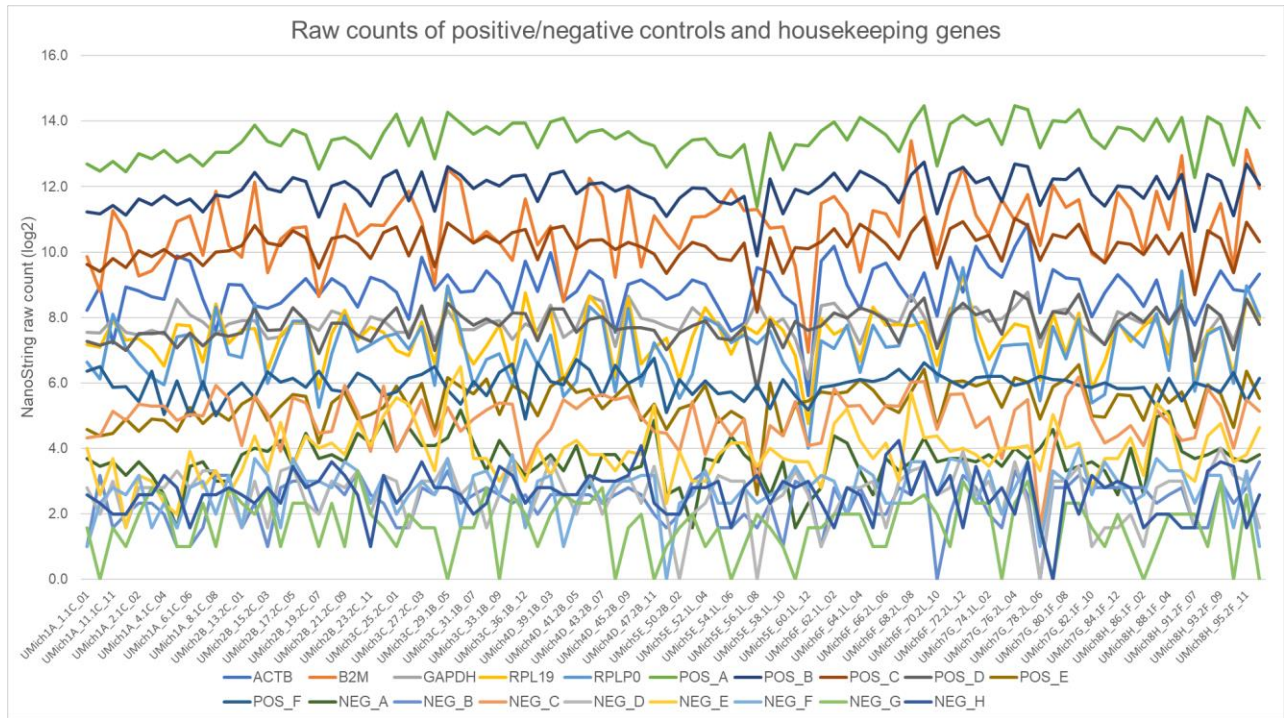

### Supplementary Figure S3. qPCR validation of differential miRNAs in fibroblasts

Dysregulated differential miRNAs in fibroblasts were validated by qPCR. Results were normalized to RNU48 and presented as fold-change calculated by the  $2^{-\Delta\Delta C_T}$  method for (A) miR-186-5p [C9-ALS, n=4; Control (Ctrl), n=3], (B) miR-165p (C9-ALS, n=7; Ctrl, n=7), (C) miR-543 (C9-ALS, n=4; nonC9-ALS, n=3; Ctrl, n=4). Analysis by Student's t-test in panels A and B and one-way ANOVA in panel C; data are represented as mean  $\pm$  standard error of the mean.

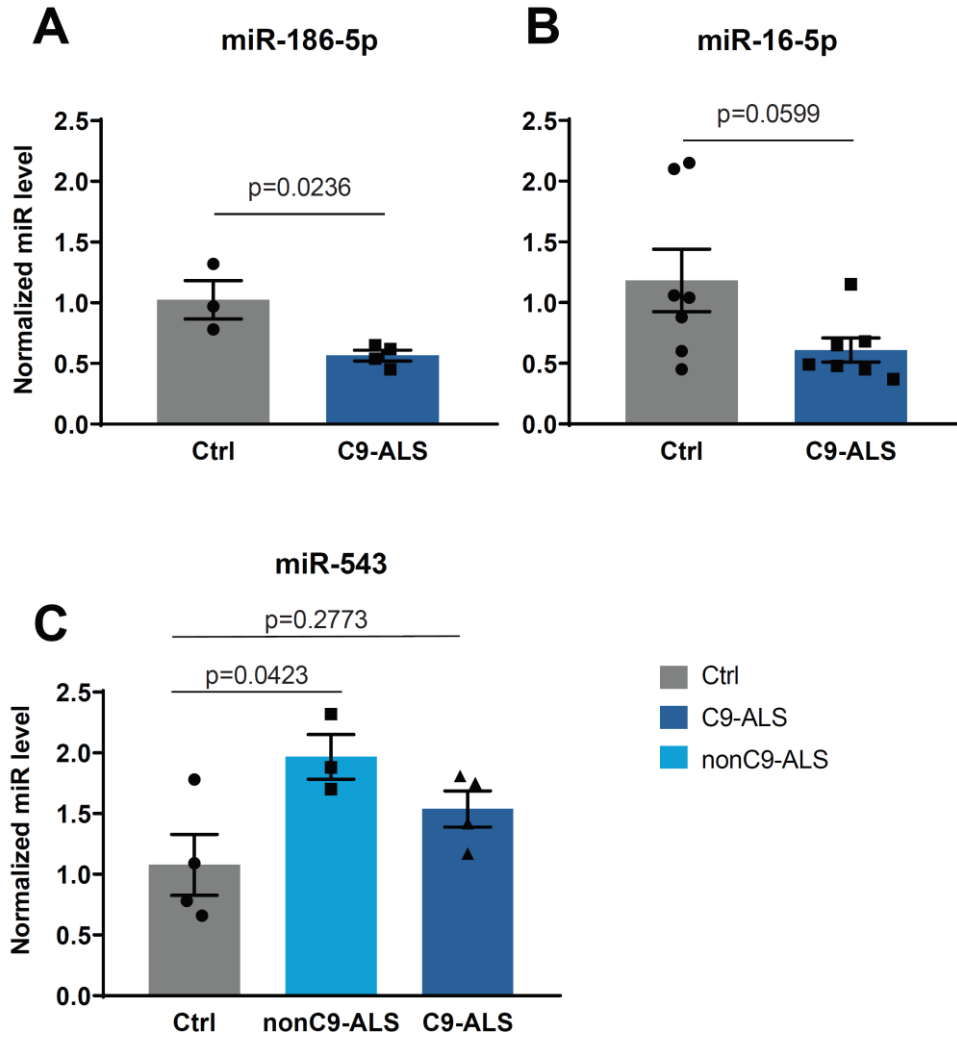

## Supplementary Tables

### Supplementary Table S1. Differential miRNAs in fibroblasts

All differential miRNAs (DmiRNAs) in fibroblasts were identified by NanoStringDiff between C9-ALS and nonC9-ALS versus controls and were deemed significant with p-value < 0.05.

DmiRNAs are ordered based on the sharing between C9-ALS and nonC9-ALS and then by log(fold-change) within each subgroup.

| Fibroblast       |          |                       |          |                          |          |
|------------------|----------|-----------------------|----------|--------------------------|----------|
| miRNA ID         | Subgroup | C9-ALS versus Control |          | nonC9-ALS versus Control |          |
|                  |          | logFC                 | p-value  | logFC                    | p-value  |
| hsa-miR-516a-3p  | Shared   | 28.02                 | 2.56E-03 | 27.52                    | 2.55E-02 |
| hsa-miR-153      | Shared   | 27.73                 | 1.05E-02 | 27.75                    | 9.86E-03 |
| hsa-miR-548ak    | Shared   | 26.21                 | 8.11E-09 | 26.01                    | 7.55E-08 |
| hsa-miR-663b     | Shared   | 24.71                 | 2.33E-03 | 25.92                    | 5.15E-07 |
| hsa-miR-141-3p   | Shared   | 22.73                 | 9.95E-05 | 22.07                    | 3.12E-03 |
| hsa-miR-217      | Shared   | 21.90                 | 2.18E-03 | 21.91                    | 3.29E-03 |
| hsa-miR-1260b    | Shared   | 18.45                 | 1.30E-02 | 19.60                    | 2.70E-05 |
| hsa-miR-302b-3p  | Shared   | 3.35                  | 1.07E-05 | 2.53                     | 5.14E-03 |
| hsa-miR-548ah-5p | Shared   | 2.97                  | 4.69E-04 | 2.66                     | 4.12E-03 |
| hsa-miR-942      | Shared   | 2.58                  | 2.55E-03 | 3.14                     | 7.25E-05 |
| hsa-miR-1180     | Shared   | 2.11                  | 3.72E-06 | 1.80                     | 1.79E-04 |
| hsa-miR-542-5p   | Shared   | 1.95                  | 2.42E-02 | 1.82                     | 4.28E-02 |
| hsa-miR-4443     | Shared   | 1.28                  | 1.90E-03 | 1.38                     | 8.84E-04 |
| hsa-miR-7-5p     | Shared   | 1.17                  | 3.41E-02 | 1.79                     | 4.88E-04 |
| hsa-miR-216a     | Shared   | 0.95                  | 1.69E-02 | 1.15                     | 3.98E-03 |
| hsa-miR-1183     | Shared   | 0.93                  | 3.75E-02 | 1.05                     | 2.02E-02 |
| hsa-miR-128      | Shared   | -0.87                 | 9.45E-03 | -0.76                    | 2.38E-02 |
| hsa-miR-197-3p   | Shared   | -0.88                 | 3.41E-03 | -1.09                    | 3.35E-04 |
| hsa-miR-92a-3p   | Shared   | -1.00                 | 2.71E-03 | -0.91                    | 6.16E-03 |
| hsa-let-7f-5p    | Shared   | -1.15                 | 4.75E-04 | -0.67                    | 4.11E-02 |
| hsa-miR-30b-5p   | Shared   | -1.24                 | 1.73E-04 | -0.92                    | 5.38E-03 |
| hsa-miR-30c-5p   | Shared   | -1.33                 | 9.29E-05 | -0.88                    | 9.71E-03 |
| hsa-miR-484      | Shared   | -1.53                 | 8.64E-05 | -0.76                    | 4.02E-02 |
| hsa-miR-3195     | Shared   | -1.54                 | 1.08E-04 | -2.06                    | 1.32E-06 |
| hsa-miR-92b-3p   | Shared   | -1.55                 | 2.75E-05 | -0.75                    | 3.46E-02 |
| hsa-miR-138-5p   | Shared   | -1.57                 | 5.73E-03 | -1.19                    | 3.52E-02 |
| hsa-miR-593-3p   | Shared   | -1.67                 | 1.74E-05 | -1.00                    | 7.64E-03 |
| hsa-miR-4516     | Shared   | -3.41                 | 4.56E-11 | -3.02                    | 3.40E-09 |
| hsa-miR-1234     | Shared   | -3.50                 | 9.49E-07 | -1.57                    | 2.87E-03 |

| Fibroblast      |              |                       |          |                          |          |
|-----------------|--------------|-----------------------|----------|--------------------------|----------|
| miRNA ID        | Subgroup     | C9-ALS versus Control |          | nonC9-ALS versus Control |          |
|                 |              | logFC                 | p-value  | logFC                    | p-value  |
| hsa-miR-4488    | Shared       | -23.75                | 6.22E-15 | -5.85                    | 4.02E-10 |
| hsa-miR-1246    | C9-unique    | 40.41                 | 0.00E+00 |                          |          |
| hsa-miR-369-5p  | C9-unique    | 30.93                 | 6.52E-04 |                          |          |
| hsa-miR-515-5p  | C9-unique    | 29.00                 | 2.20E-03 |                          |          |
| hsa-miR-524-3p  | C9-unique    | 28.00                 | 3.70E-02 |                          |          |
| hsa-miR-4458    | C9-unique    | 27.69                 | 1.14E-02 |                          |          |
| hsa-miR-922     | C9-unique    | 25.79                 | 9.40E-03 |                          |          |
| hsa-miR-3180    | C9-unique    | 25.53                 | 2.33E-02 |                          |          |
| hsa-miR-105-5p  | C9-unique    | 25.35                 | 2.42E-02 |                          |          |
| hsa-miR-215     | C9-unique    | 22.38                 | 2.72E-03 |                          |          |
| hsa-miR-550b-3p | C9-unique    | 2.14                  | 4.49E-05 |                          |          |
| hsa-miR-33a-5p  | C9-unique    | 1.75                  | 2.57E-02 |                          |          |
| hsa-miR-761     | C9-unique    | 1.59                  | 2.36E-02 |                          |          |
| hsa-miR-369-3p  | C9-unique    | 1.43                  | 4.27E-02 |                          |          |
| hsa-miR-548a-5p | C9-unique    | 1.36                  | 6.38E-03 |                          |          |
| hsa-miR-34c-3p  | C9-unique    | 1.07                  | 4.95E-02 |                          |          |
| hsa-miR-193a-5p | C9-unique    | -0.62                 | 4.84E-02 |                          |          |
| hsa-miR-409-3p  | C9-unique    | -0.66                 | 4.54E-02 |                          |          |
| hsa-miR-139-5p  | C9-unique    | -0.70                 | 3.51E-02 |                          |          |
| hsa-miR-579     | C9-unique    | -0.70                 | 3.12E-02 |                          |          |
| hsa-miR-16-5p   | C9-unique    | -0.72                 | 1.65E-02 |                          |          |
| hsa-miR-29a-3p  | C9-unique    | -0.73                 | 3.08E-02 |                          |          |
| hsa-miR-145-5p  | C9-unique    | -0.78                 | 2.17E-02 |                          |          |
| hsa-miR-489     | C9-unique    | -0.80                 | 3.23E-02 |                          |          |
| hsa-miR-365a-3p | C9-unique    | -0.83                 | 7.87E-03 |                          |          |
| hsa-miR-137     | C9-unique    | -0.84                 | 1.98E-02 |                          |          |
| hsa-miR-107     | C9-unique    | -0.89                 | 1.57E-03 |                          |          |
| hsa-miR-455-3p  | C9-unique    | -0.92                 | 1.21E-02 |                          |          |
| hsa-miR-26a-5p  | C9-unique    | -0.94                 | 6.15E-03 |                          |          |
| hsa-miR-376b    | C9-unique    | -0.95                 | 1.76E-02 |                          |          |
| hsa-miR-186-5p  | C9-unique    | -1.06                 | 6.14E-03 |                          |          |
| hsa-miR-214-3p  | C9-unique    | -1.20                 | 8.55E-05 |                          |          |
| hsa-miR-204-5p  | C9-unique    | -1.41                 | 1.01E-02 |                          |          |
| hsa-miR-597     | nonC9-unique |                       |          | 26.49                    | 5.31E-03 |
| hsa-miR-378f    | nonC9-unique |                       |          | 25.55                    | 1.42E-03 |
| hsa-miR-133b    | nonC9-unique |                       |          | 25.37                    | 3.23E-03 |
| hsa-miR-548n    | nonC9-unique |                       |          | 25.27                    | 9.71E-03 |
| hsa-miR-1323    | nonC9-unique |                       |          | 24.76                    | 7.53E-03 |

| Fibroblast      |              |                       |         |                          |          |
|-----------------|--------------|-----------------------|---------|--------------------------|----------|
| miRNA ID        | Subgroup     | C9-ALS versus Control |         | nonC9-ALS versus Control |          |
|                 |              | logFC                 | p-value | logFC                    | p-value  |
| hsa-miR-548ae   | nonC9-unique |                       |         | 23.62                    | 1.19E-02 |
| hsa-miR-367-3p  | nonC9-unique |                       |         | 21.40                    | 3.86E-02 |
| hsa-miR-627     | nonC9-unique |                       |         | 20.75                    | 3.19E-02 |
| hsa-miR-142-3p  | nonC9-unique |                       |         | 15.94                    | 6.98E-04 |
| hsa-miR-518b    | nonC9-unique |                       |         | 4.40                     | 4.00E-03 |
| hsa-miR-769-5p  | nonC9-unique |                       |         | 3.16                     | 1.05E-02 |
| hsa-miR-412     | nonC9-unique |                       |         | 3.08                     | 1.38E-02 |
| hsa-miR-514b-5p | nonC9-unique |                       |         | 2.01                     | 3.80E-04 |
| hsa-miR-95      | nonC9-unique |                       |         | 1.62                     | 6.28E-03 |
| hsa-miR-1290    | nonC9-unique |                       |         | 1.25                     | 2.36E-03 |
| hsa-miR-1233    | nonC9-unique |                       |         | 1.23                     | 3.33E-03 |
| hsa-miR-4455    | nonC9-unique |                       |         | 0.96                     | 6.37E-03 |
| hsa-miR-338-3p  | nonC9-unique |                       |         | 0.96                     | 1.97E-02 |
| hsa-miR-612     | nonC9-unique |                       |         | 0.92                     | 2.68E-02 |
| hsa-miR-548ai   | nonC9-unique |                       |         | 0.91                     | 3.16E-02 |
| hsa-miR-135b-5p | nonC9-unique |                       |         | 0.89                     | 3.78E-02 |
| hsa-miR-543     | nonC9-unique |                       |         | 0.59                     | 4.44E-02 |
| hsa-miR-27a-3p  | nonC9-unique |                       |         | -0.91                    | 1.04E-02 |
| hsa-miR-3161    | nonC9-unique |                       |         | -1.15                    | 4.00E-02 |
| hsa-miR-362-3p  | nonC9-unique |                       |         | -1.81                    | 6.80E-03 |



**Supplementary Table S2. Differential miRNAs in whole blood**

All differential miRNAs (DmiRNAs) in whole blood were identified by NanoStringDiff between C9-ALS and nonC9-ALS versus controls and were deemed significant with p-value < 0.05. DmiRNAs are ordered based on the sharing between C9-ALS and nonC9-ALS and then by log(fold-change) within each subgroup.

| Whole Blood     |           |                       |          |                          |          |
|-----------------|-----------|-----------------------|----------|--------------------------|----------|
| miRNA ID        | Subgroup  | C9-ALS versus Control |          | nonC9-ALS versus Control |          |
|                 |           | logFC                 | p-value  | logFC                    | p-value  |
| hsa-miR-96-5p   | Shared    | 30.35                 | 1.53E-03 | 28.71                    | 1.75E-02 |
| hsa-miR-483-3p  | Shared    | 27.49                 | 2.47E-04 | 26.85                    | 6.67E-04 |
| hsa-miR-515-3p  | Shared    | 25.76                 | 5.01E-08 | 23.48                    | 9.49E-05 |
| hsa-miR-215-5p  | Shared    | 25.43                 | 7.25E-04 | 25.70                    | 1.43E-05 |
| hsa-miR-665     | Shared    | 25.41                 | 2.64E-05 | 25.33                    | 2.52E-06 |
| hsa-miR-575     | Shared    | 24.39                 | 3.35E-04 | 23.78                    | 7.39E-04 |
| hsa-miR-877-5p  | Shared    | 23.96                 | 1.04E-04 | 23.54                    | 1.29E-05 |
| hsa-miR-154-5p  | Shared    | 22.89                 | 4.12E-05 | 22.18                    | 2.15E-04 |
| hsa-miR-574-5p  | Shared    | 20.16                 | 4.02E-03 | 21.99                    | 2.98E-06 |
| hsa-miR-548j-3p | Shared    | 20.03                 | 2.77E-02 | 19.62                    | 3.57E-02 |
| hsa-miR-339-5p  | Shared    | 2.74                  | 2.56E-03 | 3.24                     | 2.14E-05 |
| hsa-miR-1290    | Shared    | 2.18                  | 2.64E-02 | 2.16                     | 1.02E-02 |
| hsa-miR-128-3p  | Shared    | 2.14                  | 1.86E-02 | 1.85                     | 1.47E-02 |
| hsa-miR-30b-5p  | Shared    | 1.28                  | 2.70E-03 | 0.82                     | 1.53E-02 |
| hsa-miR-28-3p   | Shared    | 1.26                  | 7.06E-03 | 0.95                     | 1.09E-02 |
| hsa-miR-26a-5p  | Shared    | 1.19                  | 9.21E-03 | 0.96                     | 7.97E-03 |
| hsa-miR-324-3p  | Shared    | 1.17                  | 4.46E-02 | 1.56                     | 5.72E-04 |
| hsa-miR-30c-5p  | Shared    | 1.10                  | 4.58E-03 | 0.78                     | 1.02E-02 |
| hsa-miR-361-5p  | Shared    | 0.93                  | 8.30E-03 | 0.58                     | 3.32E-02 |
| hsa-miR-484     | Shared    | 0.90                  | 1.34E-02 | 0.79                     | 5.59E-03 |
| hsa-miR-92a-3p  | Shared    | 0.69                  | 3.21E-02 | 0.55                     | 2.60E-02 |
| hsa-let-7b-5p   | Shared    | -0.82                 | 4.13E-02 | -0.75                    | 7.55E-03 |
| hsa-miR-2110    | Shared    | -1.52                 | 3.77E-04 | -0.63                    | 2.73E-02 |
| hsa-miR-671-3p  | Shared    | -6.48                 | 1.60E-02 | -3.65                    | 1.10E-02 |
| hsa-miR-885-5p  | C9-unique | 31.60                 | 4.19E-03 |                          |          |
| hsa-miR-146b-5p | C9-unique | 27.69                 | 1.65E-02 |                          |          |
| hsa-miR-3614-3p | C9-unique | 26.29                 | 4.00E-11 |                          |          |
| hsa-miR-501-3p  | C9-unique | 25.59                 | 1.59E-08 |                          |          |
| hsa-miR-4536-5p | C9-unique | 25.35                 | 4.88E-03 |                          |          |
| hsa-miR-1197    | C9-unique | 24.38                 | 1.79E-03 |                          |          |
| hsa-miR-345-3p  | C9-unique | 23.84                 | 4.56E-11 |                          |          |

| Whole Blood      |              |                       |          |                          |          |
|------------------|--------------|-----------------------|----------|--------------------------|----------|
| miRNA ID         | Subgroup     | C9-ALS versus Control |          | nonC9-ALS versus Control |          |
|                  |              | logFC                 | p-value  | logFC                    | p-value  |
| hsa-miR-587      | C9-unique    | 23.69                 | 7.75E-03 |                          |          |
| hsa-miR-548g-3p  | C9-unique    | 23.25                 | 1.44E-03 |                          |          |
| hsa-miR-10b-5p   | C9-unique    | 22.60                 | 4.72E-02 |                          |          |
| hsa-miR-200a-3p  | C9-unique    | 21.88                 | 1.41E-02 |                          |          |
| hsa-miR-2682-5p  | C9-unique    | 16.83                 | 1.80E-02 |                          |          |
| hsa-miR-556-5p   | C9-unique    | 3.32                  | 3.16E-04 |                          |          |
| hsa-miR-330-5p   | C9-unique    | 2.61                  | 1.71E-02 |                          |          |
| hsa-miR-208b-5p  | C9-unique    | 2.28                  | 2.34E-03 |                          |          |
| hsa-miR-128-1-5p | C9-unique    | 1.73                  | 7.48E-04 |                          |          |
| hsa-miR-1285-5p  | C9-unique    | 1.73                  | 5.21E-03 |                          |          |
| hsa-miR-1183     | C9-unique    | 1.53                  | 2.28E-03 |                          |          |
| hsa-miR-30e-3p   | C9-unique    | 1.52                  | 9.49E-03 |                          |          |
| hsa-miR-337-3p   | C9-unique    | 1.35                  | 1.96E-02 |                          |          |
| hsa-miR-186-5p   | C9-unique    | 1.04                  | 1.00E-02 |                          |          |
| hsa-miR-150-5p   | C9-unique    | -0.54                 | 4.06E-02 |                          |          |
| hsa-miR-125a-5p  | C9-unique    | -0.62                 | 4.65E-02 |                          |          |
| hsa-miR-378i     | C9-unique    | -1.00                 | 1.64E-02 |                          |          |
| hsa-miR-1226-3p  | C9-unique    | -1.21                 | 1.25E-02 |                          |          |
| hsa-miR-320a     | C9-unique    | -1.23                 | 2.88E-02 |                          |          |
| hsa-miR-7-5p     | C9-unique    | -1.40                 | 3.69E-02 |                          |          |
| hsa-miR-378g     | C9-unique    | -2.93                 | 7.41E-03 |                          |          |
| hsa-miR-3065-5p  | C9-unique    | -3.16                 | 4.00E-04 |                          |          |
| hsa-miR-516b-5p  | C9-unique    | -19.70                | 9.48E-03 |                          |          |
| hsa-miR-498      | C9-unique    | -19.80                | 2.94E-03 |                          |          |
| hsa-miR-6511a-3p | C9-unique    | -20.22                | 1.27E-03 |                          |          |
| hsa-miR-1248     | C9-unique    | -20.74                | 8.44E-03 |                          |          |
| hsa-miR-548ak    | C9-unique    | -21.32                | 1.29E-03 |                          |          |
| hsa-miR-122-5p   | C9-unique    | -22.76                | 6.69E-05 |                          |          |
| hsa-miR-3127-5p  | C9-unique    | -23.40                | 2.43E-05 |                          |          |
| hsa-miR-3195     | C9-unique    | -23.61                | 6.18E-04 |                          |          |
| hsa-miR-494-3p   | C9-unique    | -30.09                | 2.67E-05 |                          |          |
| hsa-miR-642a-5p  | nonC9-unique |                       |          | 29.98                    | 7.05E-03 |
| hsa-miR-1306-3p  | nonC9-unique |                       |          | 29.49                    | 2.17E-02 |
| hsa-miR-875-3p   | nonC9-unique |                       |          | 29.44                    | 6.66E-04 |
| hsa-miR-3918     | nonC9-unique |                       |          | 26.78                    | 3.49E-02 |
| hsa-miR-543      | nonC9-unique |                       |          | 25.36                    | 3.63E-02 |
| hsa-miR-944      | nonC9-unique |                       |          | 24.59                    | 1.08E-02 |
| hsa-miR-371a-5p  | nonC9-unique |                       |          | 20.09                    | 6.89E-03 |

| Whole Blood     |              |                       |         |                          |          |
|-----------------|--------------|-----------------------|---------|--------------------------|----------|
| miRNA ID        | Subgroup     | C9-ALS versus Control |         | nonC9-ALS versus Control |          |
|                 |              | logFC                 | p-value | logFC                    | p-value  |
| hsa-miR-151b    | nonC9-unique |                       |         | 19.94                    | 9.03E-03 |
| hsa-miR-320b    | nonC9-unique |                       |         | 18.93                    | 3.89E-02 |
| hsa-miR-597-5p  | nonC9-unique |                       |         | 5.69                     | 2.41E-03 |
| hsa-miR-548al   | nonC9-unique |                       |         | 4.26                     | 4.31E-02 |
| hsa-miR-2117    | nonC9-unique |                       |         | 1.20                     | 4.59E-02 |
| hsa-miR-4516    | nonC9-unique |                       |         | 1.02                     | 7.65E-03 |
| hsa-miR-99a-5p  | nonC9-unique |                       |         | 1.01                     | 3.14E-02 |
| hsa-miR-182-5p  | nonC9-unique |                       |         | 0.75                     | 1.77E-02 |
| hsa-miR-197-3p  | nonC9-unique |                       |         | 0.60                     | 2.07E-02 |
| hsa-miR-145-5p  | nonC9-unique |                       |         | 0.60                     | 2.63E-02 |
| hsa-miR-331-3p  | nonC9-unique |                       |         | 0.59                     | 2.97E-02 |
| hsa-miR-423-3p  | nonC9-unique |                       |         | 0.54                     | 4.57E-02 |
| hsa-miR-1180-3p | nonC9-unique |                       |         | -0.46                    | 2.65E-02 |
